# Supplementary material for: Foaming and Physicochemical Properties of Commercial Protein Ingredients Used for Infant Formula Formulation
Source: MDPI journal article supplement (doi:10.3390/foods11223710), 2022-11-18
Supplement: s1 [file s1]

Table S1 The chemical composition of D70, D90, WPC, and SMP.

| Sample |   | Source      | Manufacturers                             | Protein (%) | Lactose (%) | Fat (%) | Moisture (%) | Ash (%) |
|--------|---|-------------|-------------------------------------------|-------------|-------------|---------|--------------|---------|
| D70    | 1 | Ireland     | Dairygold Food Ingredients Co., Ltd       | 13.69       | 81.75       | 1.18    | 0.99         | 2.17    |
|        | 2 | Finland     | Valio Co., Ltd                            | 13.00       | 81.90       | 0.90    | 1.40         | 2.80    |
|        | 3 | Germany     | Alpavit Co., Ltd                          | 12.50       | 83.20       | 0.70    | 1.10         | 2.60    |
|        | 4 | France      | Euroserum Co., Ltd                        | 12.60       | 82.10       | 0.90    | 1.80         | 2.70    |
|        | 5 | France      | Lactalis Co., Ltd.                        | 12.66       | 82.20       | 1.20    | 1.60         | 2.50    |
| D90    | 1 | France      | Lactalis Co., Ltd.                        | 13.59       | 79.00       | 1.20    | 0.85         | 0.54    |
|        | 2 | Germany     | Alpavit Co., Ltd.                         | 12.80       | 84.47       | 0.84    | 1.37         | 0.70    |
|        | 3 | Finland     | Valio Co., Ltd.                           | 12.90       | 84.10       | 0.90    | 1.20         | 0.70    |
|        | 4 | Netherlands | Frieslandcampina Co., Ltd.                | 13.50       | 83.00       | 0.30    | 2.10         | 0.80    |
|        | 5 | Germany     | Hochwald Foods Whey Ingredients Co., Ltd  | 12.87       | 80.00       | 0.60    | 1.19         | 0.84    |
| WPC    | 1 | Germany     | LIMEI Co., Ltd.                           | 80.80       | 6.80        | 4.50    | 4.30         | 3.60    |
|        | 2 | America     | Hilmar Ingredients Co., Ltd.              | 78.51       | 7.02        | 4.53    | 4.31         | 4.93    |
|        | 3 | Germany     | Sachsenmilch Co., Ltd.                    | 77.68       | 7.05        | 4.68    | 4.43         | 3.92    |
|        | 4 | Germany     | Wheyco Co., Ltd.                          | 77.77       | 7.09        | 5.67    | 4.81         | 4.66    |
|        | 5 | Germany     | Hochwald Foods Whey Ingredients Co., Ltd. | 76.40       | 6.90        | 6.60    | 4.60         | 2.50    |
| SMP    | 1 | Australia   | Union Dairy Co., Ltd.                     | 34.70       | 53.46       | 0.80    | 4.17         | 6.87    |
|        | 2 | Germany     | Molkerei Ammerland Co., Ltd.              | 32.90       | 55.40       | 0.54    | 2.71         | 7.96    |
|        | 3 | Finland     | Valio Co., Ltd.                           | 38.00       | 50.00       | 0.54    | 3.80         | 7.79    |
|        | 4 | Ireland     | Kerry Co., Ltd.                           | 34.97       | 54.20       | 0.70    | 3.20         | 7.60    |
|        | 5 | Ireland     | Dairygold Food Ingredients Co., Ltd.      | 35.00       | 53.80       | 0.90    | 3.20         | 7.10    |

**Table S2.** Foaming and physicochemical properties of D70, D90, WPC, and SMP.

|                                           | D70                             | D90                             | WPC                             | SMP                             |
|-------------------------------------------|---------------------------------|---------------------------------|---------------------------------|---------------------------------|
| Foaming capacity (%)                      | 80.3 $\pm$ 9.7 <sup>ab</sup>    | 78.8 $\pm$ 8.6 <sup>ab</sup>    | 74.1 $\pm$ 9.7 <sup>b</sup>     | 90.7 $\pm$ 9.7 <sup>a</sup>     |
| Foam stability (%)                        | 37.5 $\pm$ 18.7 <sup>b</sup>    | 31.6 $\pm$ 13.0 <sup>bc</sup>   | 16.5 $\pm$ 4.3 <sup>c</sup>     | 58.2 $\pm$ 5.5 <sup>a</sup>     |
| Particle size (nm)                        | 261.4 $\pm$ 33.9 <sup>ab</sup>  | 227.7 $\pm$ 23.5 <sup>b</sup>   | 280.5 $\pm$ 47.9 <sup>a</sup>   | 223.6 $\pm$ 15.5 <sup>b</sup>   |
| Zeta potential (mV)                       | -22.3 $\pm$ 1.9 <sup>b</sup>    | -25.3 $\pm$ 4.2 <sup>b</sup>    | -23.7 $\pm$ 4.0 <sup>b</sup>    | -17.6 $\pm$ 0.9 <sup>a</sup>    |
| Turbidity                                 | 0.30 $\pm$ 0.09 <sup>b</sup>    | 0.20 $\pm$ 0.01 <sup>b</sup>    | 0.27 $\pm$ 0.09 <sup>b</sup>    | 0.73 $\pm$ 0.13 <sup>a</sup>    |
| Solubility (%)                            | 93.7 $\pm$ 3.8 <sup>a</sup>     | 88.5 $\pm$ 6.9 <sup>a</sup>     | 86.4 $\pm$ 6.6 <sup>a</sup>     | 65.5 $\pm$ 6.1 <sup>b</sup>     |
| Surface hydrophobicity                    | 5014.6 $\pm$ 556.6 <sup>a</sup> | 4667.6 $\pm$ 702.7 <sup>a</sup> | 3138.4 $\pm$ 186.4 <sup>b</sup> | 2999.5 $\pm$ 245.6 <sup>b</sup> |
| Free sulfhydryl content<br>( $\mu$ mol/g) | 15.9 $\pm$ 3.2 <sup>a</sup>     | 13.4 $\pm$ 3.8 <sup>a</sup>     | 13.6 $\pm$ 4.0 <sup>a</sup>     | 5.1 $\pm$ 0.5 <sup>b</sup>      |
| $\alpha$ -helix (%)                       | 15.9 $\pm$ 0.6 <sup>ab</sup>    | 16.2 $\pm$ 0.8 <sup>b</sup>     | 15.6 $\pm$ 1.6 <sup>a</sup>     | 14.9 $\pm$ 0.4 <sup>c</sup>     |
| $\beta$ -sheet (%)                        | 28.2 $\pm$ 0.6 <sup>b</sup>     | 27.9 $\pm$ 0.8 <sup>b</sup>     | 29.2 $\pm$ 1.4 <sup>a</sup>     | 25.6 $\pm$ 0.6 <sup>c</sup>     |
| $\beta$ -turn (%)                         | 23.5 $\pm$ 0.4 <sup>b</sup>     | 23.6 $\pm$ 0.3 <sup>b</sup>     | 22.9 $\pm$ 0.4 <sup>c</sup>     | 24.9 $\pm$ 0.2 <sup>a</sup>     |
| Random coil (%)                           | 32.3 $\pm$ 0.4 <sup>b</sup>     | 32.3 $\pm$ 0.3 <sup>b</sup>     | 32.3 $\pm$ 0.1 <sup>b</sup>     | 36.4 $\pm$ 0.3 <sup>a</sup>     |

Different letters (a-c) indicate significant differences at  $p < 0.05$ .
